# Supplementary material
Source: Springer Nature journal article supplement (https://www.springermedizin.de/resource/supplementary/12882_2011_193_MOESM1_ESM.pdf/9453384)
Supplement: MOESM1 [file 9453384]

## Timeline (weeks)

-12 weeks

SCREENING

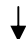

-12-0 weeks

RUN-IN

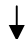

0 week

BASELINE ASSESSMENT

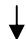

0 week

RANDOMIZATION TO  
STUDY INTERVENTION

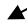

ADALIMUMAB

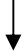

GALACTOSE

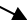

CONSERVATIVE

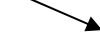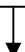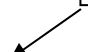

26 weeks

PRIMARY OUTCOME  
ASSESSMENT

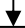

POST INTERVENTION  
MONITORING
